# Supplementary material for: Waterborne polyurethanes prepared from benzophenone derivatives with delayed fluorescence and room-temperature phosphorescence
Source: Royal Society of Chemistry journal article supplement (doi:10.1039/c7py01995e), 2018-01-01
Supplement: c7py01995e1.pdf [file c7py01995e1.pdf]

## Electronic Supplementary Information

### Waterborne Polyurethanes Prepared from Benzophenone Derivative with Delayed Fluorescence and Room-Temperature Phosphorescence

Tao Wang, Cao Zhou, Xingyuan Zhang\*, Dong Xu

CAS Key Laboratory of Soft Matter Chemistry, Department of Polymer Science and  
Engineering, University of Science and Technology of China, Hefei, Anhui, 230026,  
P. R. China

Corresponding E-mail: zzym@ustc.edu.cn

**Table S1** Detailed information of each component in WPUs and molecular weight measured by GPC

| Sample <sup>a</sup> | PTMG/g | IPDI/g | DMPA/<br>g | BDO/g | DNBP/g | wt <sup>b</sup> /% | <i>M<sub>n</sub></i> <sup>c</sup> | PDI <sup>d</sup> |
|---------------------|--------|--------|------------|-------|--------|--------------------|-----------------------------------|------------------|
| DNBP-WPU0           | 8.00   | 5.35   | 1.15       | 0.85  | 0      | 0                  | 25200                             | 2.78             |
| DNBP-WPU1           | 8.00   | 5.45   | 1.15       | 0.80  | 0.16   | 1                  | 26600                             | 3.15             |
| DNBP-WPU2           | 8.00   | 5.45   | 1.15       | 0.75  | 0.31   | 2                  | 23700                             | 2.69             |
| DNBP-WPU5           | 8.00   | 5.45   | 1.15       | 0.58  | 0.79   | 5                  | 24500                             | 3.50             |
| DNBP-WPU10          | 8.00   | 5.45   | 1.15       | 0.35  | 1.65   | 10                 | 25500                             | 3.35             |
| DNBP-WPU20          | 8.00   | 5.45   | 0.98       | 0     | 3.58   | 20                 | 27400                             | 4.20             |

<sup>a</sup>all samples were prepared at PTMG : IPDI = 1 : 6; <sup>b</sup>Weight percentage of DNBP in WPU; <sup>c</sup>Number-average molecular weight measured in THF; <sup>d</sup>Polydispersity index ( $PDI = M_w/M_n$ )

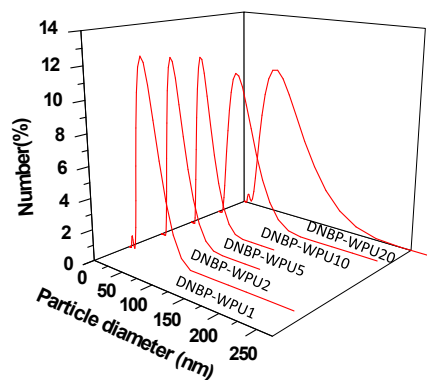

**Fig. S1** Particle-size distribution for the aqueous dispersion of DNBP-WPU1 (28.6nm), DNBP-WPU2 (28.2nm), DNBP-WPU5 (20.0nm), DNBP-WPU10 (27.8nm), DNBP-WPU20 (45.9nm)

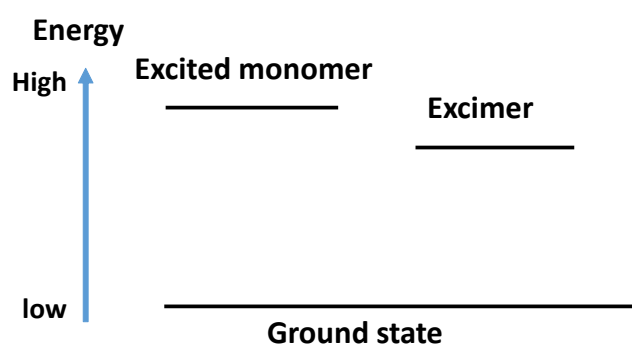

**Fig. S2** Graphic illustration of the decreased energy of excited-state molecules due to the formation of excimers.

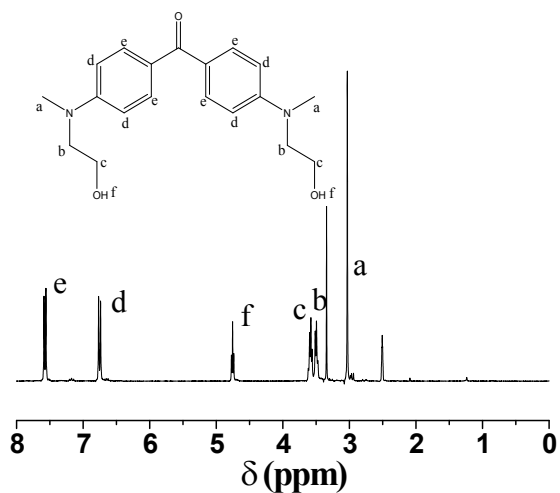

**Fig. S3**  $^1\text{H}$  NMR of DNBP in  $\text{d}_6$ -DMSO.

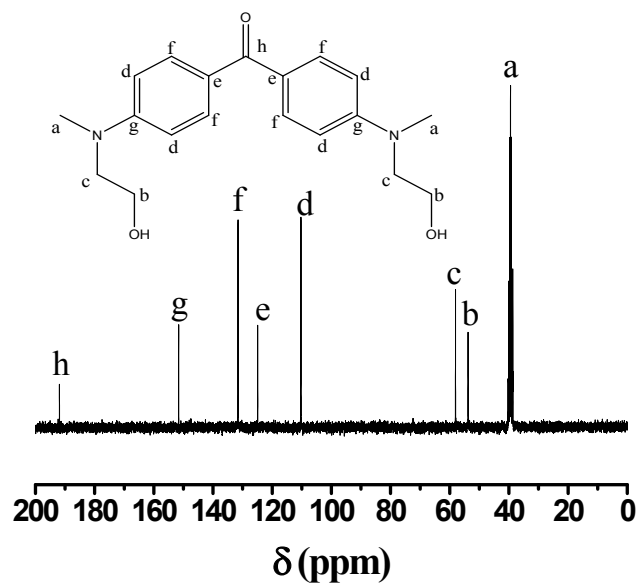

Fig. S4  $^{13}\text{C}$  NMR of DNBP in  $\text{d}_6$ -DMSO.

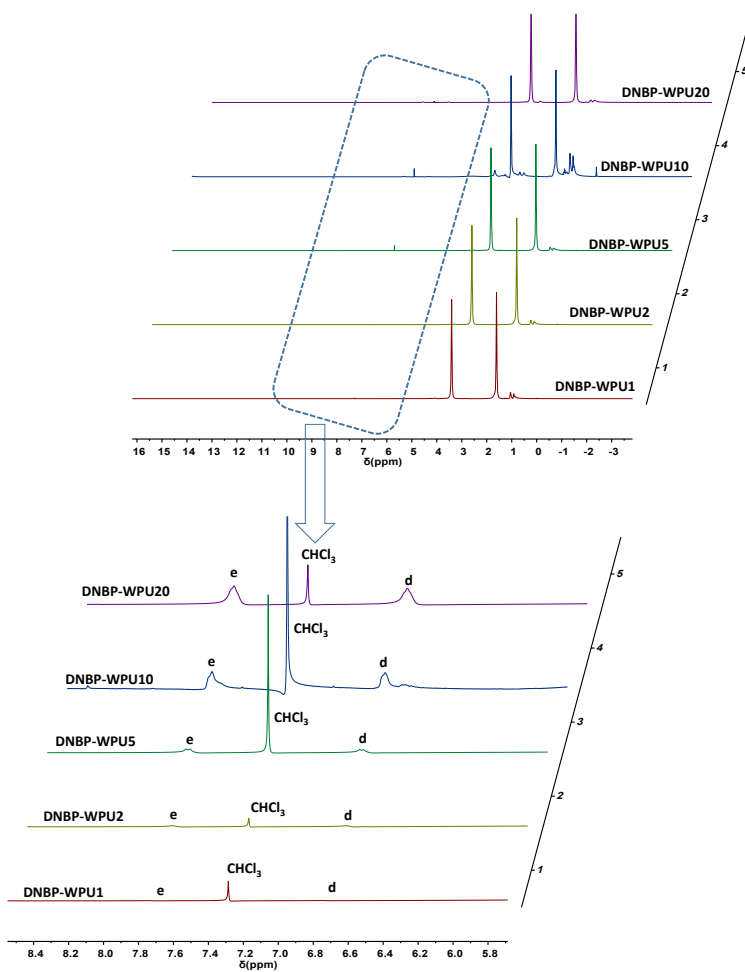

Fig. S5  $^1\text{H}$  NMR of DNBP-WPUs in  $\text{CDCl}_3$ .
